# Supplementary material for: Tooth loss and the risk of cognitive decline and dementia: A meta-analysis of cohort studies
Source: PubMed Central journal article supplement (PMC10150074; doi:10.3389/fneur.2023.1103052), 2023-04-17
Supplement: Table_1.pdf [file Table_1.pdf]

**Supplemental Table 1 Characteristics of included studies in the meta-analysis**

| Study source          | Sex     | Sample | Study name                                        | Country     | Type                                   | Baseline age d(years)     | Tooth loss assessment       | Outcome assessment     | Follow-up time (years) | Covariates                                                                                                       |
|-----------------------|---------|--------|---------------------------------------------------|-------------|----------------------------------------|---------------------------|-----------------------------|------------------------|------------------------|------------------------------------------------------------------------------------------------------------------|
| Shimazaki et al. 2001 | M/<br>F | 517    | None                                              | Japan       | Mental Impairment                      | 79.7 ± 7.5 (range:59-107) | Dental examination          | Medical records        | 6                      | Age, physical health status, classification of institution and cerebrovascular disorder                          |
| Kim et al. 2007       | M/<br>F | 686    | Dementia in Developing Countries Research Program | South Korea | AD, VaD and other subtypes of dementia | mean 73.4                 | Dental examination          | Cognitive examinations | 2                      | Age, sex and education, vascular disease/risk (Stroke, heart disease, hypertension, diabetes and smoking status) |
| Stein et al. 2007     | M/<br>F | 133    | Nun Study                                         | USA         | Dementia                               | 75-98 (mean 84 yrs)       | Medical records             | Cognitive examinations | 12                     | Age, education and apolipoprotein E4 allele                                                                      |
| Kaye et al. 2010      | M       | 597    | Veterans Affairs Dental Longitudinal Study        | USA         | Poor Cognitive Function                | 28-70                     | Dental examination          | Cognitive examinations | 10                     | Coronary heart disease, average alcohol intake (g/day), and number of teeth at baseline                          |
| Yamamoto et al. 2012  | M/<br>F | 4425   | Aichi Gerontological Evaluation Study             | Japan       | Dementia                               |                           | Self-reported questionnaire | Insurance records      | 4                      | Age, household income, BMI, present illness, alcohol consumption, exercise, and forgetfulness                    |

---

|                           |         |      |                                                                                                            |          |                                                  |                          |                                |                                                                                                                                                  |    |                                                                                                                                                                                                                                                                                  |
|---------------------------|---------|------|------------------------------------------------------------------------------------------------------------|----------|--------------------------------------------------|--------------------------|--------------------------------|--------------------------------------------------------------------------------------------------------------------------------------------------|----|----------------------------------------------------------------------------------------------------------------------------------------------------------------------------------------------------------------------------------------------------------------------------------|
| Arrive' E et al. 2012     | M/<br>F | 405  | (AGES)<br>Project<br>Personnes<br>Age'es<br>QUID<br>(PAQUID)<br>Study                                      | France   | AD, VaD, and<br>other<br>subtypes of<br>dementia | >65                      | Dental<br>examinations         | Neuropsychol<br>ogical testing                                                                                                                   | 10 | Sex, BMI, diabetes,<br>depression, hypertension and<br>ischemic cardiopathy/history<br>of brain stroke                                                                                                                                                                           |
| Paganini-Hill et al. 2012 | M/<br>F | 5468 | Leisure<br>World<br>Cohort<br>Study                                                                        | USA      | Dementia                                         | 52-105<br>(median<br>81) | Self-reported<br>questionnaire | questionnaire<br>s, hospital<br>records, death<br>certificates,<br>and in-person<br>neurological<br>and<br>neuropsychol<br>ogical<br>evaluations | 12 | Age at entry, smoking,<br>alcohol, caffeine, active<br>activities, other activities,<br>BMI, high blood pressure,<br>angina pectoris, heart attack,<br>stroke, diabetes mellitus,<br>rheumatoid arthritis, cancer,<br>education, head trauma, and<br>family history of dementia. |
| Reyes-Ortiz et al. 2013   | M/<br>F | 1967 | Hispanic<br>Established<br>Populations<br>for<br>Epidemiolo<br>gic Studies<br>of the<br>Elderly<br>(EPESE) | American | Cognitive<br>impairment                          | 65+                      | In-home<br>interview           | In-home<br>interview<br>(MMSE)                                                                                                                   | 5  | None                                                                                                                                                                                                                                                                             |

---

|                        |         |       |                                                                                                                                                              |                                                                                     |                                      |                              |                                |                                                                                        |    |                                                                                                                                                                                                                                                                                                                                                                                                                                                                                                                                                                                                                                                                                                                                              |
|------------------------|---------|-------|--------------------------------------------------------------------------------------------------------------------------------------------------------------|-------------------------------------------------------------------------------------|--------------------------------------|------------------------------|--------------------------------|----------------------------------------------------------------------------------------|----|----------------------------------------------------------------------------------------------------------------------------------------------------------------------------------------------------------------------------------------------------------------------------------------------------------------------------------------------------------------------------------------------------------------------------------------------------------------------------------------------------------------------------------------------------------------------------------------------------------------------------------------------------------------------------------------------------------------------------------------------|
| Batty et al.<br>2013   | M/<br>F | 11140 | Action in<br>Diabetes<br>and<br>Vascular<br>disease:<br>Preterax and<br>Diamicron<br>Modified-R<br>elease<br>Controlled<br>Evaluation<br>(ADVANC<br>E) trial | 20<br>countries<br>(in<br>Australasi<br>a, Asia,<br>Europe<br>and North<br>America) | Dementia and<br>cognitive<br>decline | 55-88<br>(mean<br>65.78) yrs | Questionnaire                  | Professional-<br>administered<br>questionnaire<br>(MMSE)and<br>specialist<br>diagnosis | 5  | Age, sex, existing illness (one<br>or more of the following: use<br>of metformin/beta-blockers,<br>history of macrovascular or<br>microvascular disease, or<br>those requiring assistance with<br>daily activities, plus diabetes<br>duration), behavioural CVD<br>risk factors (cigarette smoking,<br>alcohol intake, vigorous<br>physical activity in previous<br>week),physiological CVD risk<br>factors (Haemoglobin A1c,<br>creatinine, BMI, total<br>cholesterol, HDL cholesterol,<br>resting heart rate, SBP, DBP),<br>psychological CVD risk<br>factors (Quality of life (EQ-5d<br>score), Socio-economic CVD<br>risk factors (age at completion<br>of highest level of education,<br>height), treatment allocation<br>and ethnicity |
| Hansson et<br>al. 2014 | M/<br>F | 1408  | Betula<br>prospective<br>cohort study                                                                                                                        | Sweden                                                                              | Dementia                             | 71.2±8.2                     | Self-reported<br>questionnaire | Psychiatrist<br>diagnosis                                                              | 20 | Age, sex, formal education,<br>apolipoprotein E-4 status                                                                                                                                                                                                                                                                                                                                                                                                                                                                                                                                                                                                                                                                                     |

|                      |         |      |                                                       |         |                                      |                     |                                              |                                                                                     |    |                                                                                                                                                                               |
|----------------------|---------|------|-------------------------------------------------------|---------|--------------------------------------|---------------------|----------------------------------------------|-------------------------------------------------------------------------------------|----|-------------------------------------------------------------------------------------------------------------------------------------------------------------------------------|
| Stewart et al. 2015  | F       | 580  | Prospective Population Study of Women (PPSW)          | Sweden  | AD, VaD, and other types of dementia | 77.09±5.64          | Clinical examination and radiological survey | Neuropsychiatric examinations and medical records                                   | 13 | Age                                                                                                                                                                           |
| Takeuchi et al. 2017 | M/<br>F | 1566 | Hisayama Study                                        | Japan   | All-cause dementia                   | 60+                 | Oral examination                             | Neurological examinations, neuropsychological tests, interviews and medical records | 5  | Sex, age, occupation, education, hypertension, diabetes mellitus, history of stroke, alcohol intake, tooth brushing frequency, regular visits to the dentist, and denture use |
| Chen et al. 2010     | M/<br>F | 134  | None                                                  | USA     | Dementia                             | 73.8± 10.7 (44-103) | Medical records                              | Medical records                                                                     | 7  | None                                                                                                                                                                          |
| Stewart et al. 2013  | M/<br>F | 945  | Health, Aging and Body Composition (Health ABC) Study | USA     | Cognitive Decline                    | 73.5 ± 2.8          | Visual inspection                            | Cognitive assessment (3MS)                                                          | 3  | None                                                                                                                                                                          |
| Tsakos et al. 2015   | M/<br>F | 3166 | the English Longitudinal Study of                     | England | Poor memory                          | 70.57±2.18          | Self-reported questionnaire                  | Cognitive assessment (10-word                                                       | 10 | Time, age, sex, marital status, socioeconomic position (education and wealth),                                                                                                |

|                   |         |        | Ageing<br>(ELSA)                                                     |             |                      |                    |                    | recall test)                |    | number of cardiovascular and noncardiovascular comorbidities, gait speed category, health behaviors (smoking, frequency of alcohol consumption, physical activity), depressive symptoms, BMI, and waist circumference   |
|-------------------|---------|--------|----------------------------------------------------------------------|-------------|----------------------|--------------------|--------------------|-----------------------------|----|-------------------------------------------------------------------------------------------------------------------------------------------------------------------------------------------------------------------------|
| Saito et al. 2018 | M/<br>F | 491    | Ohasama study                                                        | Japan       | Cognitive impairment | 70.9 ± 4.3         | Dental examination | Cognitive assessment (MMSE) | 4  | Age, sex, hypertension, diabetes, cerebrovascular/cardiovascular disease, hypercholesterolemia, depressive symptoms, BMI, current smoker status, current drinker status, duration of education, and baseline MMSE score |
| Yoo et al. 2019   | M/<br>F | 209806 | National Health Insurance Service-Elderly Cohort Database (NHIS-ECD) | South Korea | Dementia             | 60-103 (mean 67.5) | Medical records    | Medical records             | 11 | Age, sex, hypertension, diabetes, cerebrovascular/cardiovascular disease, hypercholesterolemia, depressive symptoms, BMI, current smoker status, current drinker status, duration of education, and baseline            |

|                       |         |       |                                                                                                                             |                |                                           |                                                                   |                                |                                                                        |    |                                                                                                                                                                                                                                                                                                |
|-----------------------|---------|-------|-----------------------------------------------------------------------------------------------------------------------------|----------------|-------------------------------------------|-------------------------------------------------------------------|--------------------------------|------------------------------------------------------------------------|----|------------------------------------------------------------------------------------------------------------------------------------------------------------------------------------------------------------------------------------------------------------------------------------------------|
| Kim et al.<br>2020    | M/<br>F | 20230 | National<br>Health<br>Insurance<br>Service-Nat<br>ional Health<br>Screening<br>Retrospecti<br>ve Cohort<br>(NHIS-HE<br>ALS) | South<br>Korea | AD, VaD, and<br>comorbid of<br>AD and VaD | 78.1±4.9                                                          | Dental<br>examination          | Diagnosed<br>By a<br>neurologist<br>and<br>psychiatrist                | 13 | MMSE score<br>Sociodemographic,<br>anthropomorphic, and lifestyle<br>factors (sex, age, household<br>income, insurance status, BMI,<br>total cholesterol, smoking and<br>drinking status, and frequency<br>of physical activity) and<br>comorbidities (hypertension<br>and diabetes mellitus). |
| Kim et al.<br>2021    | M/<br>F | 39810 | Korean<br>National<br>Health<br>Insurance<br>Service<br>Health<br>Screening<br>Cohort<br>study                              | Korea          | AD                                        | ≥60                                                               | Dental<br>examination          | ICD-10,<br>ICD-10-CM                                                   | 13 | obesity, smoking, alcohol<br>consumption, systolic blood<br>pressure, diastolic blood<br>pressure, fasting blood<br>glucose, total cholesterol, and<br>the Charlson Comorbidity<br>Index scores                                                                                                |
| Kiuchi et al.<br>2022 | M/<br>F | 35744 | Japan<br>Gerontologi<br>cal<br>Evaluation<br>Study                                                                          | Japan          | Dementia                                  | 73.2 (73.1<br>± 5.5 for<br>men and<br>73.2 ± 5.5<br>for<br>women) | Self-reported<br>questionnaire | Dementia<br>Scale in the<br>Japanese<br>Long-term<br>Care<br>Insurance | 6  | weight loss, vegetable and<br>fruit intake, homeboundness,<br>social network as mediators;<br>age and baseline, marital<br>status, denture use, income,<br>education level, hypertension,                                                                                                      |

---

|                  |         |       |                                                           |       |                         |                                           |                                |        |                                                   |                                                                                                                                                                                                                  |
|------------------|---------|-------|-----------------------------------------------------------|-------|-------------------------|-------------------------------------------|--------------------------------|--------|---------------------------------------------------|------------------------------------------------------------------------------------------------------------------------------------------------------------------------------------------------------------------|
|                  |         |       |                                                           |       |                         |                                           |                                | System |                                                   | diabetes mellitus, drinking history, smoking history, and walking time included as covariates                                                                                                                    |
| Yang et al. 2022 | M/<br>F | 17079 | Chinese<br>Longitudinal<br>Healthy<br>Longevity<br>Survey | China | Cognitive<br>impairment | median 83<br>years, IQR<br>74-90<br>years | Self-reported<br>questionnaire | MMSE   | median<br>9.1 years<br>(IQR<br>3.8–13.3<br>years) | age, sex, ethnicity, education level, residence, coresidence, sufficient income, smoking, drinking, fruit intake, vegetable intake, body mass index, hypertension, activities of daily living, self-rated health |

---

Abbreviation: M, male; F, female; AD, Alzheimer's disease; VaD, vascular dementia; MMSE, Mini-mental State Examination; 3MS, Modified Mini-Mental State Examination; CVD, cardiovascular disease; BMI, Body Mass Index; SBP, systolic blood pressure; DBP, diastolic blood pressure; HbA1c, Glycated haemoglobin; ICD, International Classification of Diseases; CM, Clinical Modification; IQR, interquartile range.
