# Supplementary material for: Tooth loss and the risk of cognitive decline and dementia: A meta-analysis of cohort studies
Source: PubMed Central journal article supplement (PMC10150074; doi:10.3389/fneur.2023.1103052), 2023-04-17
Supplement: Table_2.pdf [file Table_2.pdf]

Supplementary Table 2 Quality assessment of studies

| Original study            | Selection                                |                                     |                           |                                                                          | Comparability | Exposure                                                        |                       |                                                 | Total score |
|---------------------------|------------------------------------------|-------------------------------------|---------------------------|--------------------------------------------------------------------------|---------------|-----------------------------------------------------------------|-----------------------|-------------------------------------------------|-------------|
|                           | Representativeness of the exposed cohort | Selection of the non-exposed cohort | Ascertainment of exposure | Demonstration that outcome of interest was not present at start of study |               | Comparability of cohorts on the basis of the design or analysis | Assessment of outcome | Was follow-up long enough for outcomes to occur |             |
| Shimazaki et al. 2001     | 1                                        | 1                                   | 1                         | 1                                                                        | 2             | 1                                                               | 1                     | 1                                               | 9           |
| Kim et al. 2007           | 1                                        | 1                                   | 1                         | 1                                                                        | 2             | 1                                                               | 1                     | 1                                               | 9           |
| Stein et al. 2007         | 0                                        | 1                                   | 1                         | 1                                                                        | 2             | 1                                                               | 1                     | 1                                               | 8           |
| Kaye et al. 2010          | 0                                        | 1                                   | 1                         | 1                                                                        | 1             | 1                                                               | 1                     | 1                                               | 7           |
| Yamamoto et al. 2012      | 1                                        | 1                                   | 0                         | 1                                                                        | 2             | 1                                                               | 1                     | 1                                               | 8           |
| Arrive' et al. 2012       | 0                                        | 1                                   | 1                         | 1                                                                        | 1             | 1                                                               | 1                     | 1                                               | 7           |
| Paganini-Hill et al. 2012 | 1                                        | 1                                   | 0                         | 1                                                                        | 2             | 1                                                               | 1                     | 1                                               | 8           |
| Reyes-Ortiz et al. 2013   | 1                                        | 1                                   | 1                         | 1                                                                        | 0             | 1                                                               | 1                     | 0                                               | 6           |
| Batty et al. 2013         | 1                                        | 1                                   | 0                         | 1                                                                        | 2             | 1                                                               | 1                     | 1                                               | 8           |
| Hansson et al. 2014       | 0                                        | 1                                   | 0                         | 1                                                                        | 2             | 1                                                               | 1                     | 1                                               | 7           |
| Stewart et al. 2015       | 1                                        | 1                                   | 1                         | 1                                                                        | 1             | 1                                                               | 1                     | 1                                               | 8           |
| Takeuchi et al. 2017      | 1                                        | 1                                   | 0                         | 1                                                                        | 2             | 1                                                               | 1                     | 1                                               | 8           |
| Chen et al. 2010          | 0                                        | 1                                   | 1                         | 1                                                                        | 0             | 1                                                               | 1                     | 0                                               | 5           |
| Stewart et al. 2013       | 0                                        | 1                                   | 1                         | 1                                                                        | 0             | 1                                                               | 1                     | 1                                               | 6           |
| Tsakos et al. 2015        | 1                                        | 1                                   | 1                         | 1                                                                        | 2             | 1                                                               | 1                     | 1                                               | 9           |
| Saito et al. 2018         | 1                                        | 1                                   | 1                         | 1                                                                        | 2             | 1                                                               | 1                     | 1                                               | 9           |
| Yoo et al. 2019           | 1                                        | 1                                   | 1                         | 1                                                                        | 2             | 1                                                               | 1                     | 1                                               | 9           |
| Kim et al. 2020           | 1                                        | 1                                   | 1                         | 1                                                                        | 1             | 1                                                               | 1                     | 0                                               | 7           |
| Kim et al. 2021           | 1                                        | 1                                   | 1                         | 1                                                                        | 2             | 1                                                               | 1                     | 1                                               | 9           |
| Yang et al. 2022          | 1                                        | 1                                   | 1                         | 1                                                                        | 2             | 1                                                               | 1                     | 0                                               | 8           |
| Kiuchi et al. 2022        | 1                                        | 1                                   | 0                         | 1                                                                        | 2             | 1                                                               | 1                     | 0                                               | 7           |
