# Supplementary material for: Tooth loss and the risk of cognitive decline and dementia: A meta-analysis of cohort studies
Source: PubMed Central journal article supplement (PMC10150074; doi:10.3389/fneur.2023.1103052), 2023-04-17
Supplement: Table_3.pdf [file Table_3.pdf]

Supplemental Table 3 Subgroup analysis of relative risks for the association between tooth loss and AD

| Subgroup           |               | No of studies | Relative risk | 95% <i>CI</i> | Heterogeneity |          |                           |
|--------------------|---------------|---------------|---------------|---------------|---------------|----------|---------------------------|
|                    |               |               |               |               | <i>Q</i>      | <i>P</i> | <i>I</i> <sup>2</sup> (%) |
| Overall            |               |               | 1.11          | 1.03-1.21     | 28            | <0.01    | 63.9                      |
| Location           | Asia          | 4             | 1.11          | 1.02-1.20     | 26            | <0.01    | 69.7                      |
|                    | Europe        | 1             | 1.91          | 0.70-5.23     | 0             | -        | -                         |
|                    | North America | 1             | 1.10          | 0.47-2.58     | 0             | -        | -                         |
|                    |               |               |               |               |               |          |                           |
| Sex                | Male          | 1             | 1.28          | 1.11-1.49     | 0             | 0.68     | 0.0                       |
|                    | Female        | 3             | 1.19          | 1.12-1.27     | 1             | 0.83     | 0.0                       |
|                    | Mixed         | 3             | 1.09          | 1.00-1.18     | 23            | <0.01    | 68.9                      |
| Edentulousness     | No            | 2             | 1.06          | 0.98-1.16     | 18            | <0.01    | 72.9                      |
|                    | Yes           | 1             | 1.62          | 0.87-3.03     | 0             | -        | -                         |
|                    | Mixed         | 4             | 1.32          | 1.12-1.55     | 1             | 0.87     | 0.0                       |
| Tooth number       | <9            | 4             | 1.13          | 1.03-1.25     | 10            | 0.08     | 49.0                      |
|                    | 10-19         | 2             | 0.99          | 0.91-1.08     | 2             | 0.29     | 19.4                      |
|                    | Unspecific    | 2             | 1.31          | 1.11-1.55     | 0             | 0.93     | 0.0                       |
| Follow-up duration | ≥ 5 years     | 4             | 1.39          | 1.17-1.65     | 2             | 0.89     | 0.0                       |
|                    | < 5 years     | 1             | 1.30          | 1.00-1.70     | 0             | -        | -                         |
|                    | Mixed         | 1             | 1.05          | 0.96-1.13     | 15            | <0.01    | 79.3                      |
